# Supplementary material
Source: PubMed Central journal article supplement (PMC4516566)

Figure S1. Flow Chart of Study Participants for Validation Study

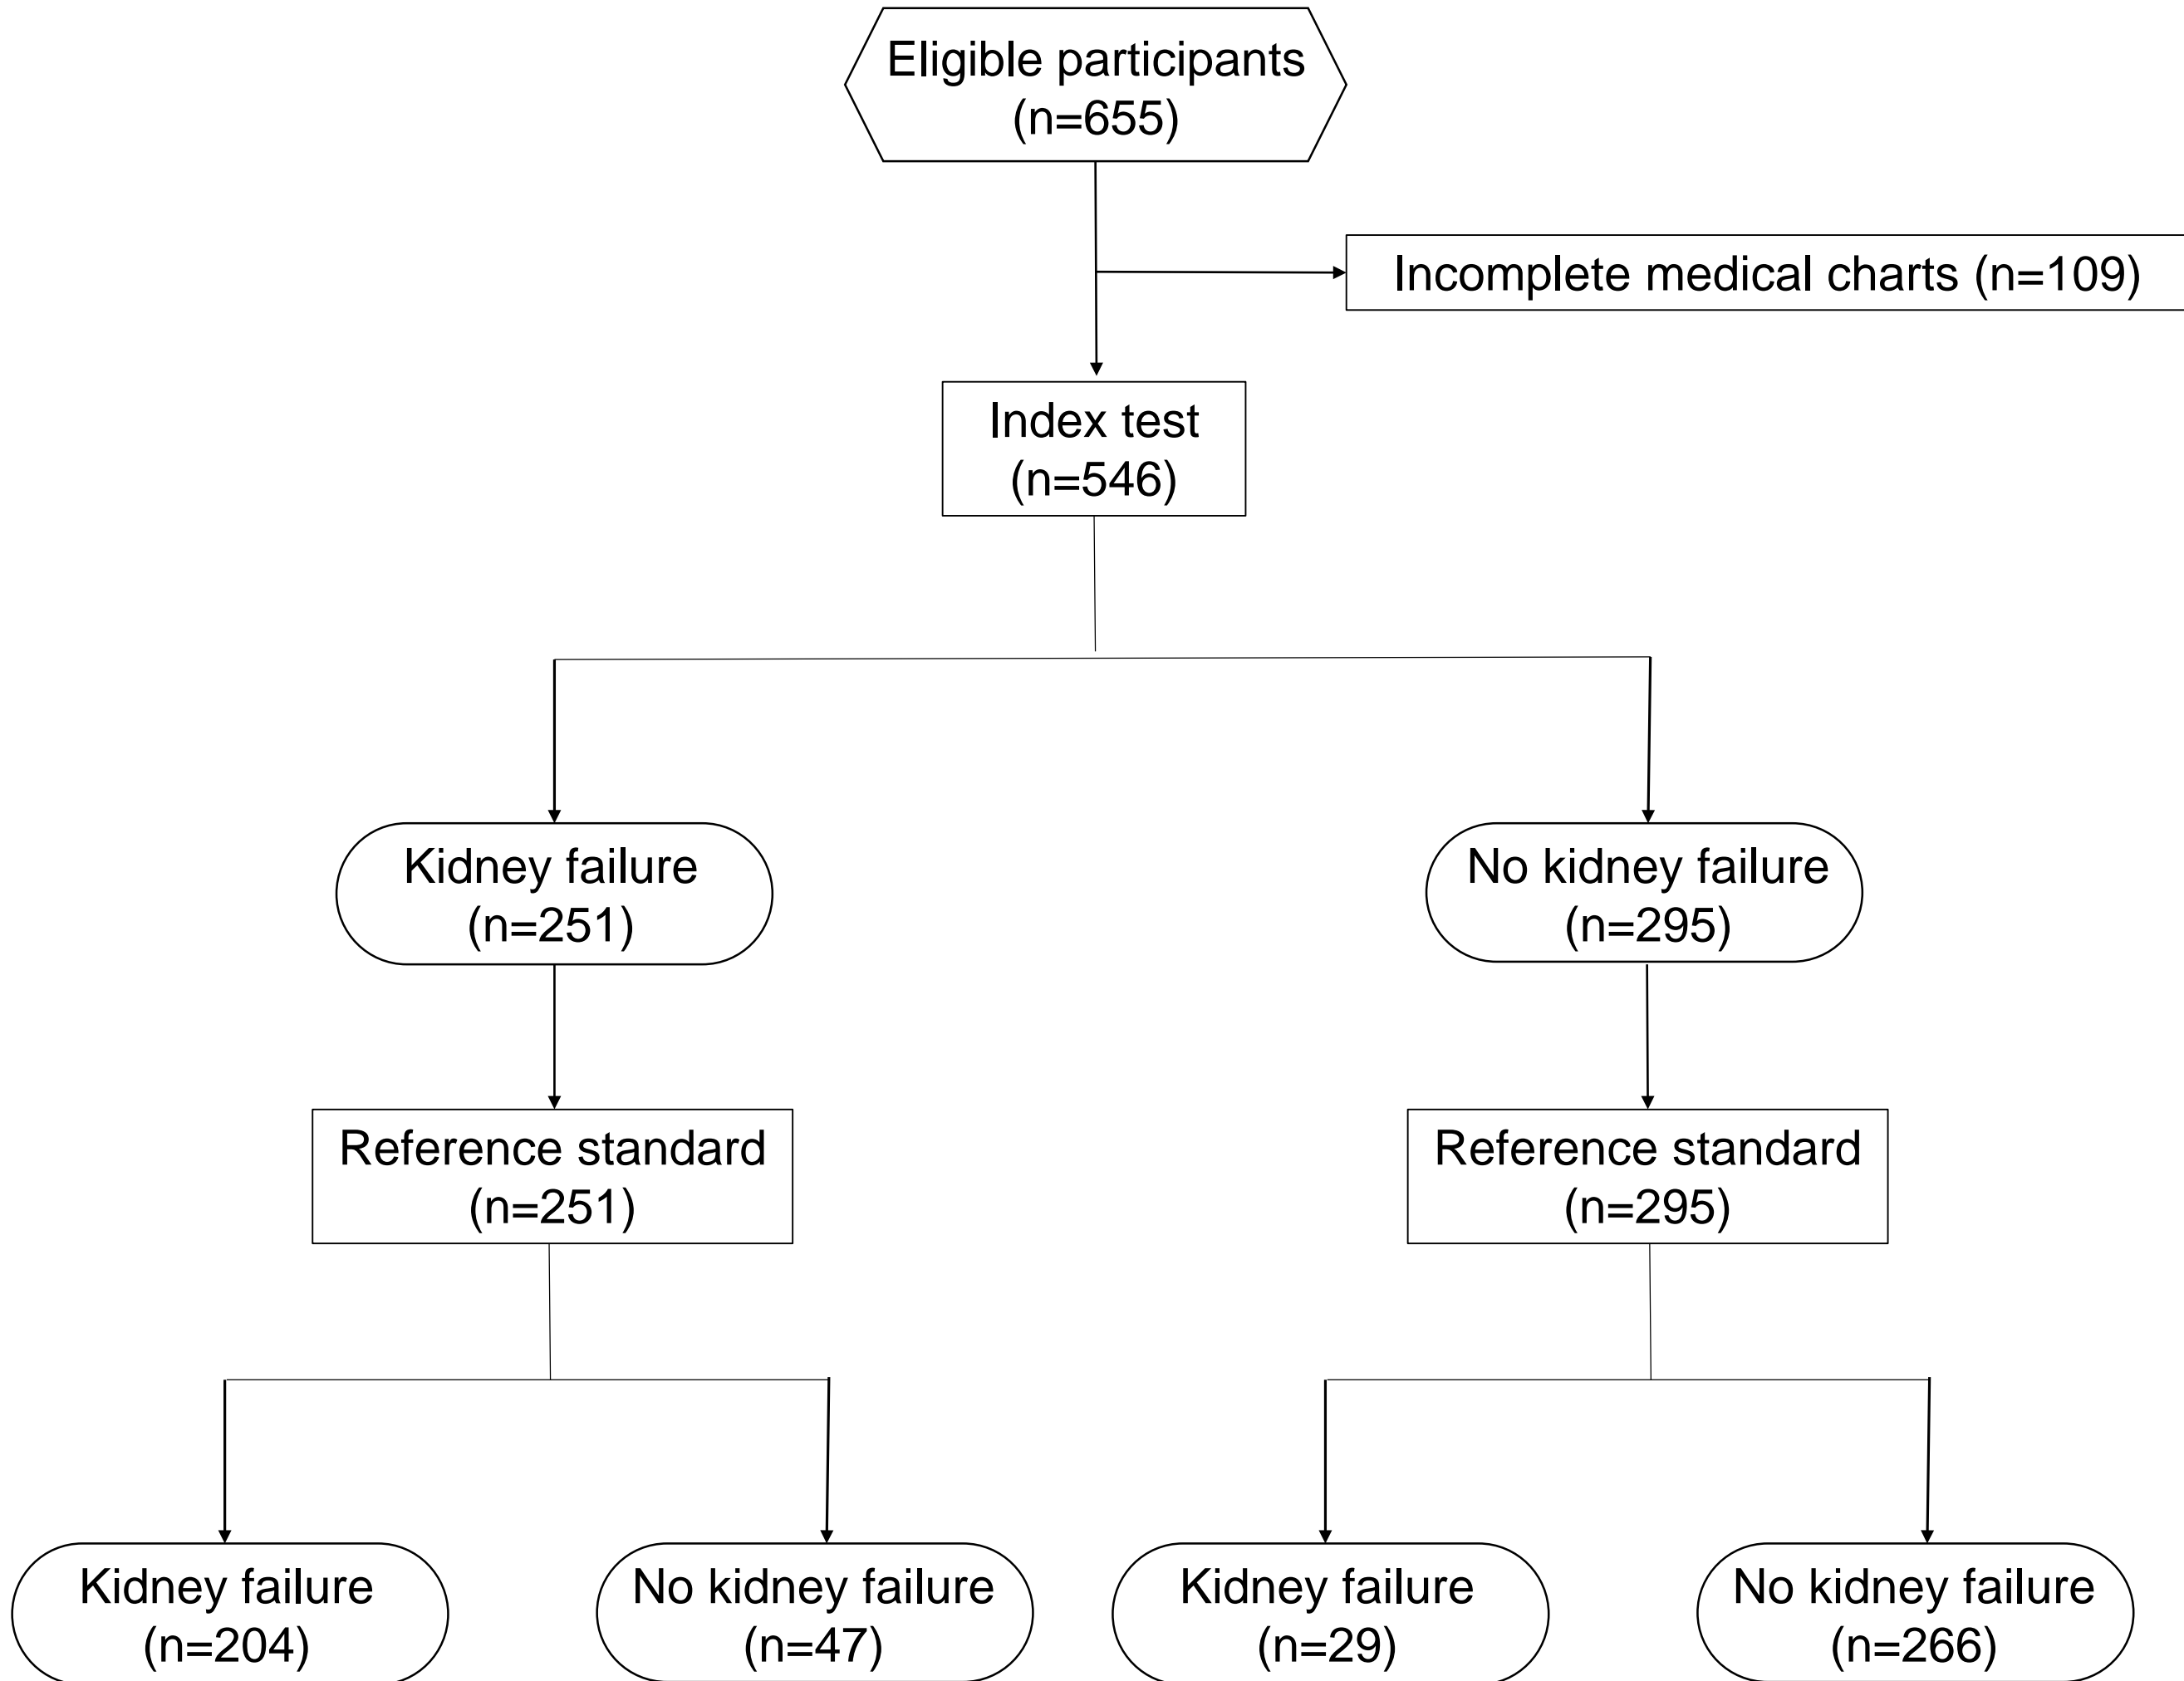

Supplement: NIHMS664884-supplement-1.pdf [file NIHMS664884-supplement-1.pdf]
